# Supplementary material for: Intracellular Delivery of siRNAs Targeting AKT and ERBB2 Genes Enhances Chemosensitization of Breast Cancer Cells in a Culture and Animal Model
Source: PubMed Central journal article supplement (PMC6781320; doi:10.3390/pharmaceutics11090458), 2019-09-03
Supplement: pharmaceutics-11-00458-s001.pdf [file pharmaceutics-11-00458-s001.pdf]

# Supplementary Materials: Intracellular Delivery of siRNAs Targeting AKT and ERBB2 Genes Enhances Chemosensitization of Breast Cancer Cells in a Culture and Animal Model

Tahereh Fatemian, Hamid Reza Moghimi and Ezharul Hoque Chowdhury

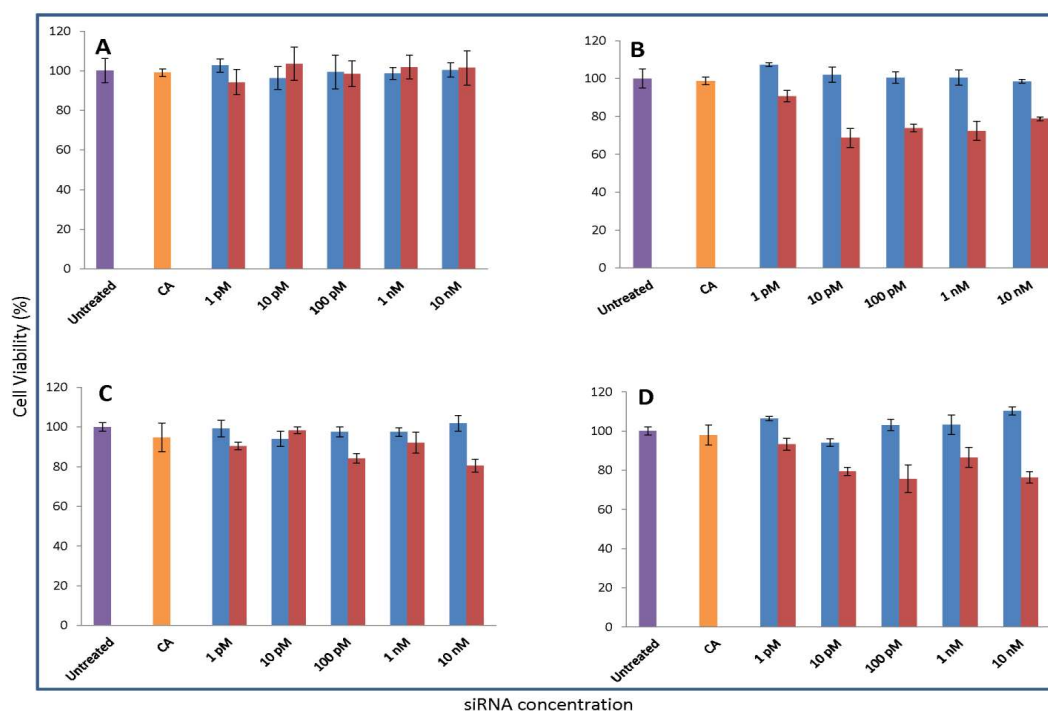

**Figure S1.** Cell viability assessment in 4T1 cells treated with siRNA loaded carbonate apatite. Nanoparticles were formed by using 4 mM of Calcium together with 1 pM to 10 nM of each siRNA (A: AKT, B: ERBB2, C: MAPK, D: ROS1). Two days after treatment, MTT assay was performed. Values are presented as cell viability (%) compared to untreated cells. ● Free siRNA ● CA/siRNA.

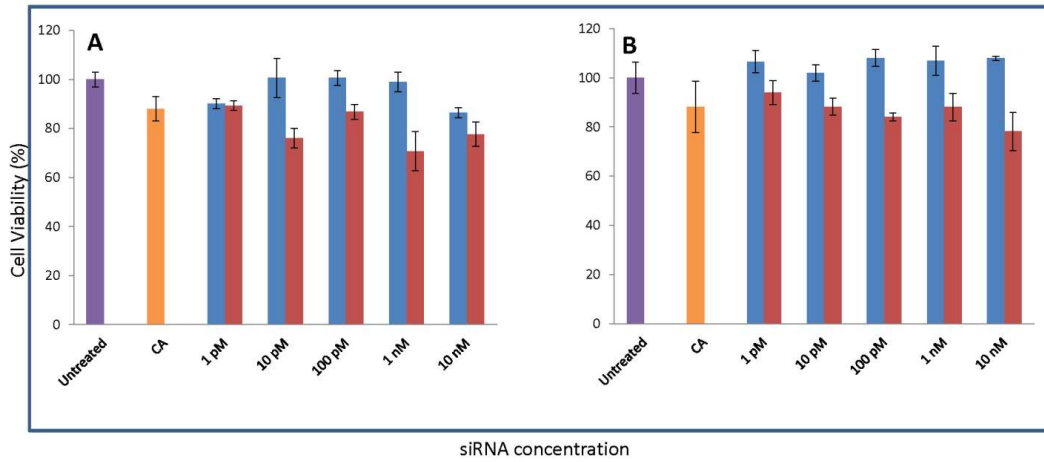

**Figure S2.** Carbonate apatite facilitated delivery of ERBB2 (A) and ROS1 (B) siRNA to MCF-7 cells. With 4 mM of CaCl<sub>2</sub> and various concentrations of siRNA (1 pM to 10 nM), cells were treated and MTT assay was performed two days after treatment. Values are presented as cell viability (%) compared to untreated cells. ● free siRNA ● CA/siRNA.

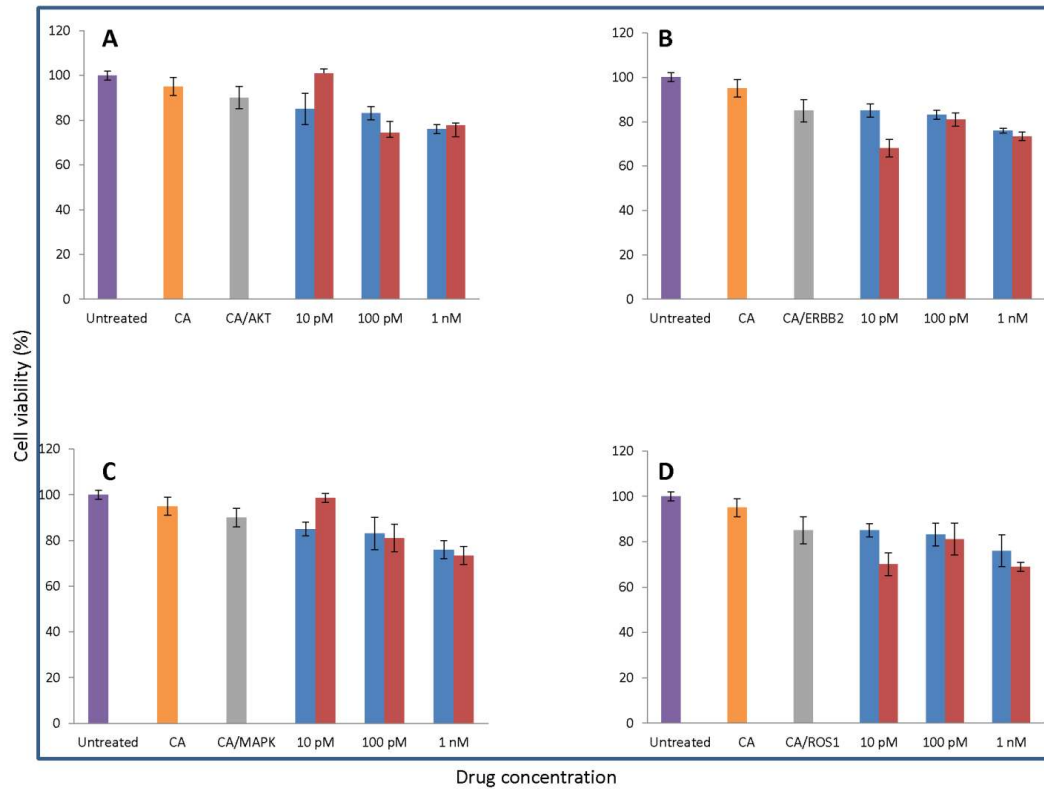

**Figure S3.** Effect of single pathway silencing on cytotoxicity of paclitaxel on 4T1 cells. By incorporation of 3 mM Ca, 1 pM AKT (A), ERBB2 (B), MAPK (C) and ROS1 (D) siRNA together with 10 pM, 100 pM and 1 nM paclitaxel into apatite structure, cells were treated. Two days post treatment, MTT assay was conducted to produce results of cell viability (%) compared to untreated cells. ● CA/Pac, ● CA/siRNA/Pac.

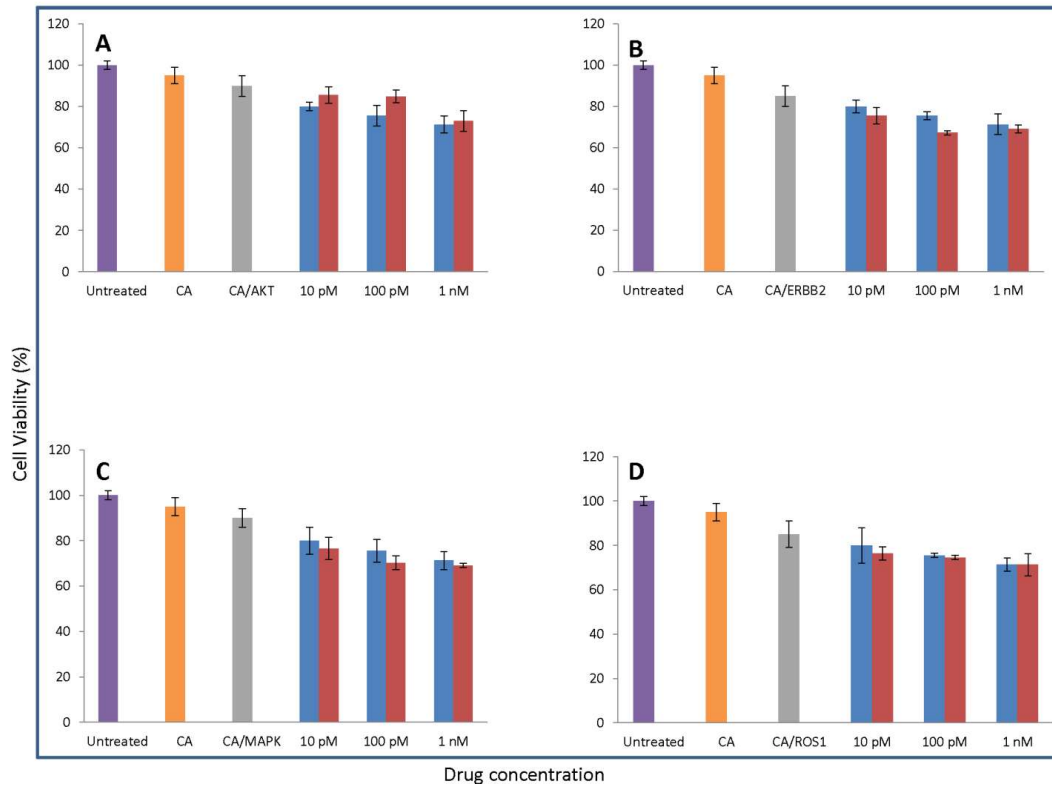

**Figure S4.** Effect of single pathway silencing on cytotoxicity of docetaxel on 4T1 cells. By incorporation of 3 mM Ca, 1 pM AKT (A), ERBB2 (B), MAPK (C) and ROS1 (D) siRNA together with 10 pM, 100 pM and 1 nM docetaxel into apatite structure, cells were treated. Two days post treatment, MTT assay was conducted to produce results of cell viability (%) compared to untreated cells. ● CA/Doc, ● CA/siRNA/Doc.

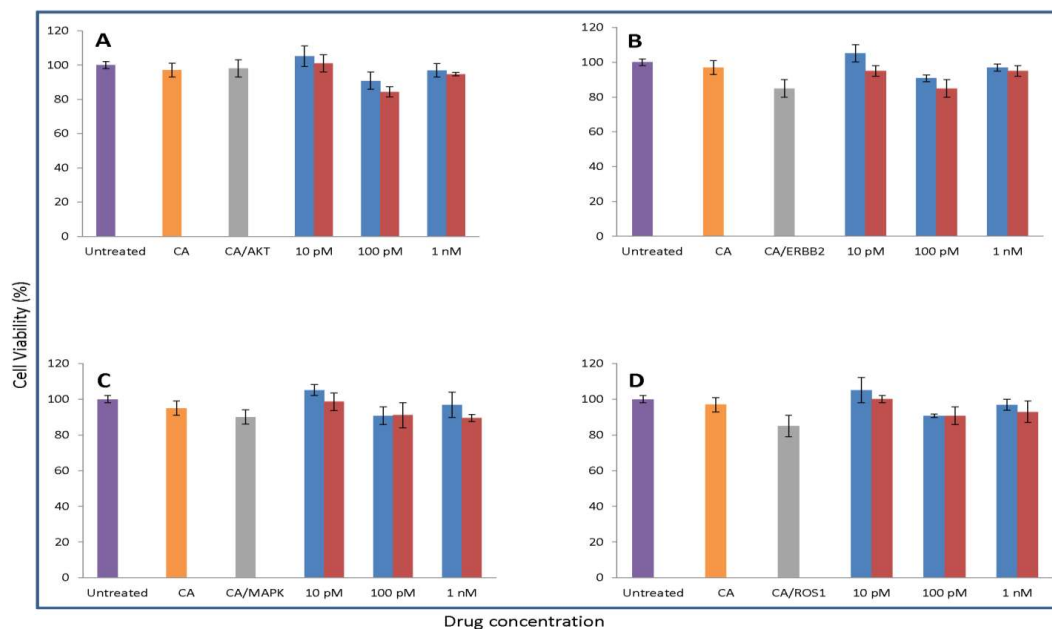

**Figure S5.** Effect of single pathway silencing on cytotoxicity of mitomycin C on 4T1 cells. By incorporation of 3 mM Ca, 1 pM AKT (A), ERBB2 (B), MAPK (C) and ROS1 (D) siRNA together with 10 pM, 100 pM and 1 nM Mitomycin C into apatite structure, cells were treated. Two days post treatment, MTT assay was conducted to produce results of cell viability (%) compared to untreated cells. ● CA/Mito, ● CA/siRNA/Mito.

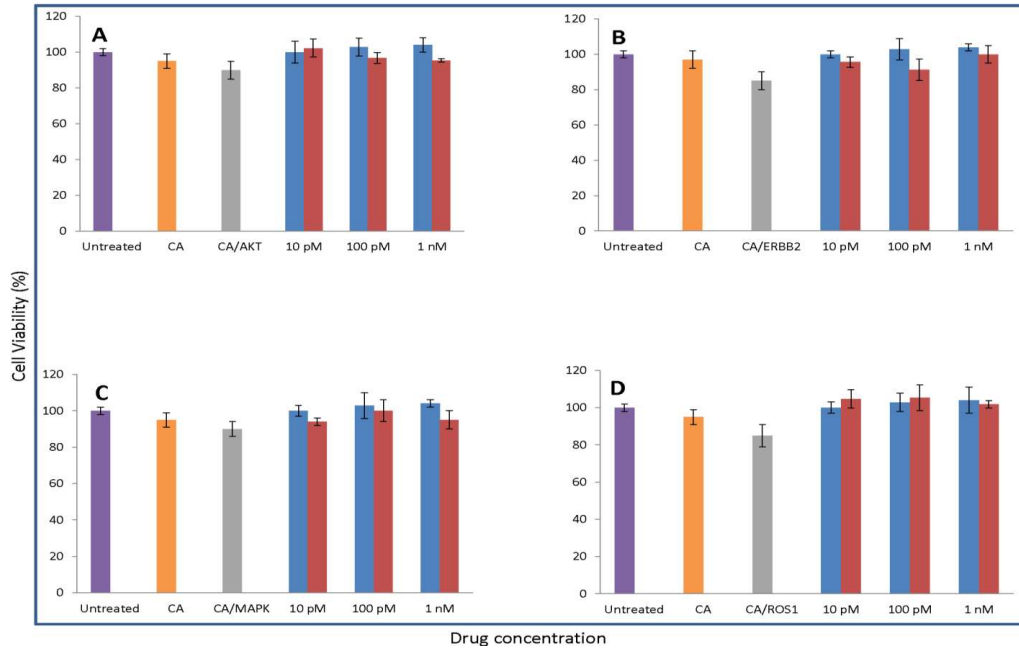

**Figure S6.** Effect of single pathway silencing on cytotoxicity of topotecan on 4T1 cells. By incorporation of 3 mM Ca, 1 pM AKT (A), ERBB2 (B), MAPK (C) and ROS1 (D) siRNA together with 10 pM, 100 pM and 1 nM topotecan into apatite structure, cells were treated. Two days post treatment, MTT assay was conducted to produce results of cell viability (%) compared to untreated cells. ● CA/Topo, ● CA/siRNA/Topo.

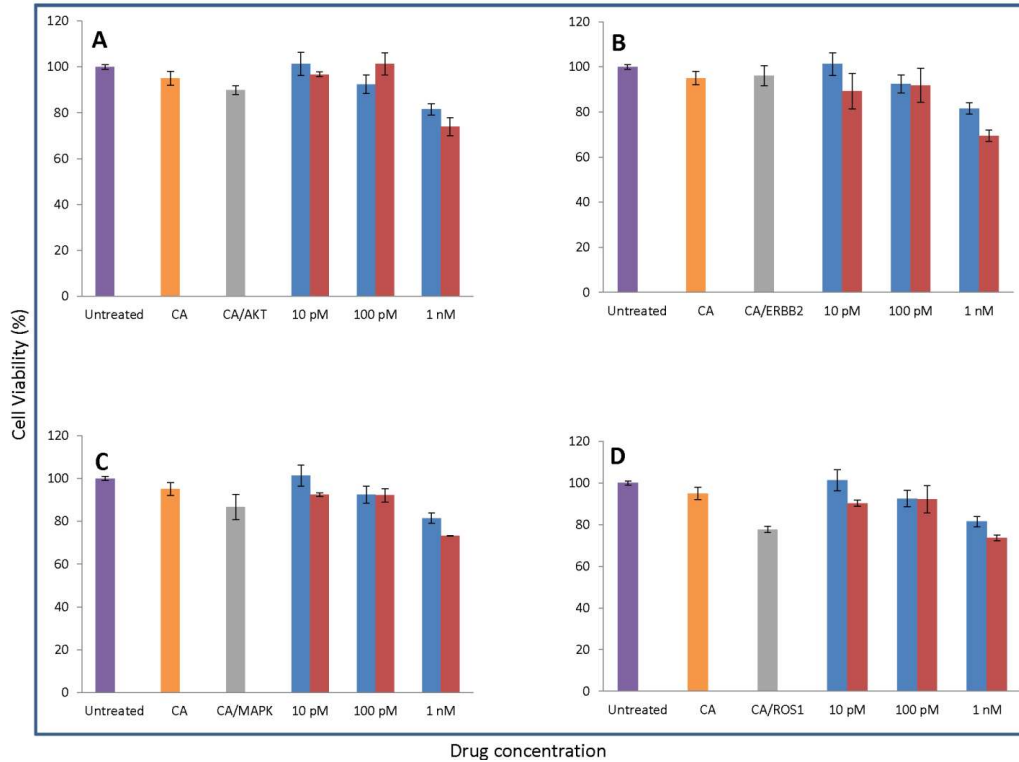

**Figure S7.** Effects of single pathway silencing on paclitaxel cytotoxicity in MDA-MB-231. Cells were treated with complexes of apatite formed with 3 mM of Ca together with 1 nM of AKT (A), ERBB2 (B), MAPK (C) and ROS1 (D) siRNA and 10 pM, 100 pM and 1 nM of Pac. MTT assay was performed two days after treatment and results were calculated as cell viability (%). ● CA/Pac, ● CA/siRNA/Pac.

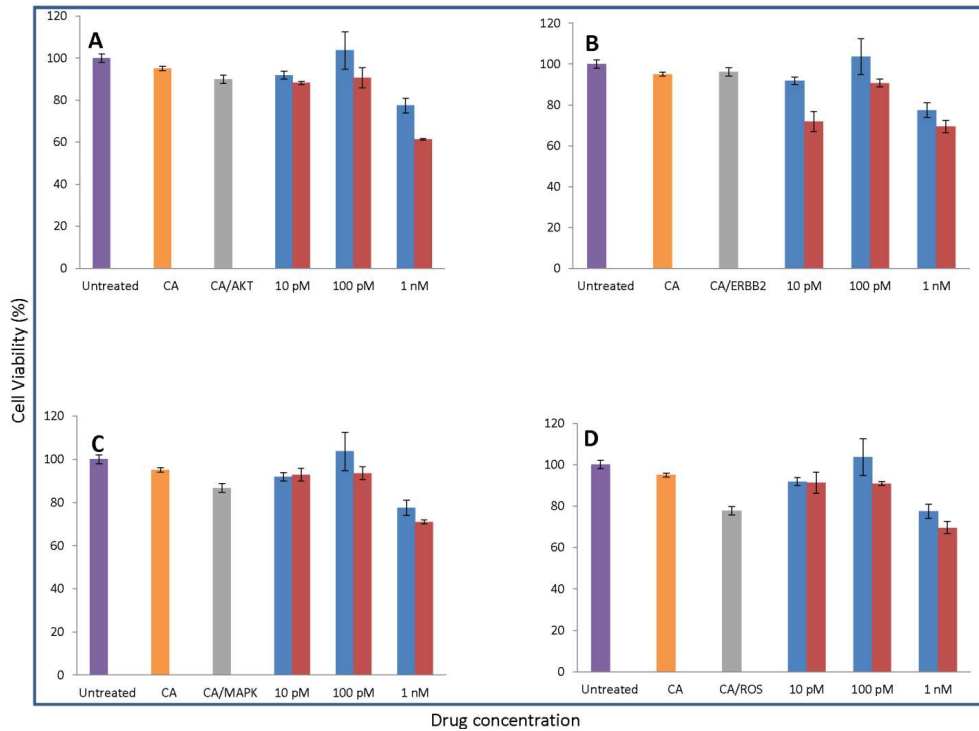

**Figure S8.** Effects of single pathway silencing on docetaxel cytotoxicity. MDA-MB-231 cells were treated with complexes of apatite formed with 3 mM of Ca together with 1 nM of AKT (A), ERBB2 (B), MAPK (C) and ROS1 (D) siRNA and 10 pM, 100 pM and 1 nM of Doc. MTT assay was performed two days after treatment and results were calculated as cell viability (%). ● CA/Doc, ● CA/siRNA/Doc.

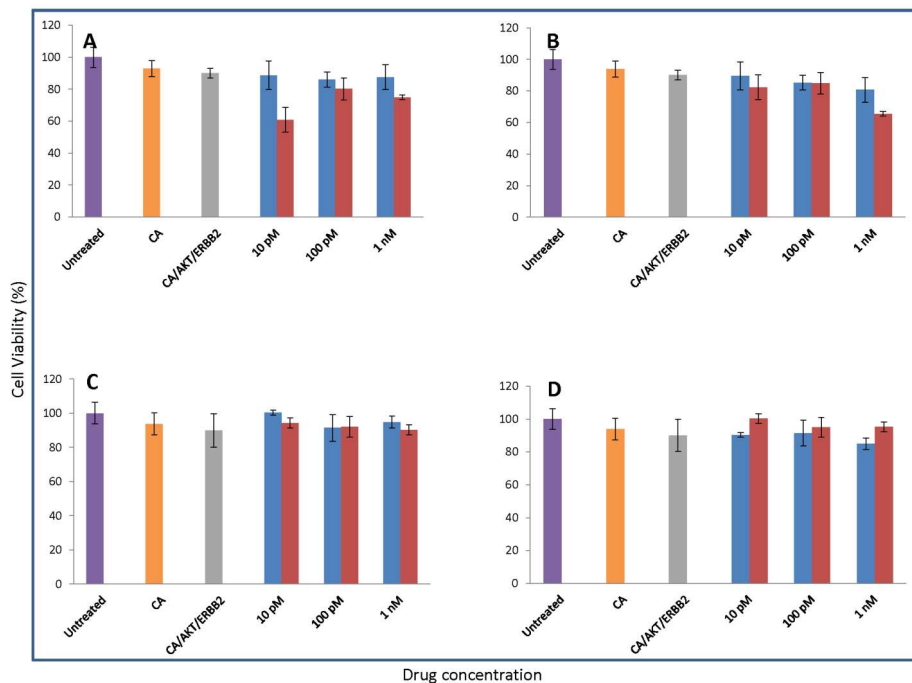

**Figure S9.** Effects of silencing AKT and ERBB2 oncogenes on drugs cytotoxicity in 4T1. Cells were treated with complexes of apatite formed with 3 mM of Ca together with 1 pM of AKT and ERBB2 siRNA and 10 pM, 100 pM and 1 nM of Pac (A), Doc (B), Mito (C), Topo (D). MTT assay was performed two days after treatment and results were calculated as cell viability (%). ● CA/drug, ● CA/AKT/ERBB2/drug.

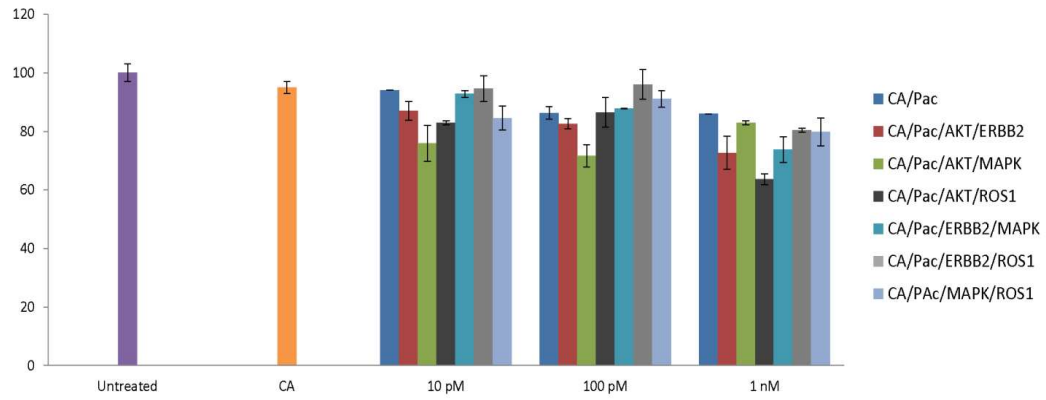

**Figure S10.** Cell viability assay on MDA-MB-231 cells treated with carbonate apatite complexed with paclitaxel and two siRNAs. By addition of 3 mM Ca, 1 nM siRNA and 10 pM, 100 pM and 1 nM of Pac, cells were treated and then subject to MTT assay after two days. Results are presented as cell viability (%).
